# Supplementary material for: Lp-PLA2 activity is associated with increased risk of diabetic retinopathy: a longitudinal disease progression study
Source: Springer Nature journal article supplement (doi:10.1007/s00125-018-4601-7), 2018-04-06
Supplement: MOESM1 [file 15596518]

## Online-Only Supplemental Material

Title: Lp-PLA<sub>2</sub> activity is associated with increased risk of diabetic retinopathy: a longitudinal disease progression study

Moneeza K Siddiqui<sup>1</sup>, Gwen Kennedy<sup>2</sup>, Fiona Carr<sup>1</sup>, Alexander SF Doney<sup>2</sup>, Ewan Pearson<sup>1</sup>, Andrew D Morris<sup>3</sup>, Toby Johnson<sup>4</sup>, Megan M McLaughlin<sup>5</sup>, Rachel E Williams<sup>6</sup>, Colin NA Palmer<sup>1</sup>

### Author Affiliations

<sup>1</sup> Pat McPherson Centre for Pharmacogenetics and Pharmacogenomics, University of Dundee School of Medicine, United Kingdom

<sup>2</sup> Ninewells Hospital and Medical School, University of Dundee, United Kingdom

<sup>3</sup> Usher Institute of Population Health Sciences and Informatics, University of Edinburgh, United Kingdom

<sup>4</sup> GlaxoSmithKline Medicines Research Centre, Gunnels Wood Road, Stevenage, United Kingdom

<sup>5</sup> Alternative Discovery and Development, Research & Development, GlaxoSmithKline, King of Prussia, PA

<sup>6</sup> Worldwide Epidemiology, GlaxoSmithKline, Collegeville, PA

Running head: Lp-PLA<sub>2</sub> activity and diabetic retinopathy

Address for reprints

Professor Colin N A Palmer ORCID: 0000-0002-6415-6560

Pat McPherson Centre for Pharmacogenetics and Pharmacogenomics

University of Dundee School of Medicine

Ninewells Hospital and Medical School

United Kingdom

Telephone: +44 01382 383155

Fax: +44 01382 383598

Email: [c.n.a.palmer@dundee.ac.uk](mailto:c.n.a.palmer@dundee.ac.uk)

## Competing Risk: Association of Lp-PLA<sub>2</sub> and death in the GoDARTS cohort

*ESM Table 1: Hazards ratios of death by Lp-PLA<sub>2</sub> quartiles in the GoDARTS cohort, adjusted for gender and age*

| <b>Lp-PLA<sub>2</sub> quartiles</b> | <b>Hazard Ratios (95% CI)</b> | <b>P value</b> |
|-------------------------------------|-------------------------------|----------------|
| 1                                   | --                            | --             |
| 2                                   | 0.98 (0.84, 1.14)             | 0.77           |
| 3                                   | 1.26 (1.09, 1.46) **          | 0.002          |
| 4                                   | 1.45 (1.24, 1.68) ***         | <0.0001        |

ESM Table 2. Hazard Ratios of Lp-PLA<sub>2</sub> quartiles in all model shown separately for each variable added to develop the final model

| Variables in model                                                                                                            | Hazard Ratios (95% Confidence Limits) of Lp-PLA <sub>2</sub> quartiles | P-values |
|-------------------------------------------------------------------------------------------------------------------------------|------------------------------------------------------------------------|----------|
| <b>Development of incident DR from disease-free state (DR0 to DR1 or higher) n = 1013</b>                                     |                                                                        |          |
| <b><i>Lp-PLA<sub>2</sub> quartiles</i></b>                                                                                    |                                                                        |          |
| Lp-PLA <sub>2</sub> Quartile 2 v. 1                                                                                           | 1.33 (1.08, 1.64)                                                      | 0.0079   |
| Lp-PLA <sub>2</sub> Quartile 3 v. 1                                                                                           | 1.56 (1.28, 1.90)                                                      | <0.0001  |
| Lp-PLA <sub>2</sub> Quartile 4 v. 1                                                                                           | 1.52 (1.24, 1.86)                                                      | <0.0001  |
| <b><i>Lp-PLA<sub>2</sub> quartiles + sex</i></b>                                                                              |                                                                        |          |
| Lp-PLA <sub>2</sub> Quartile 2 v. 1                                                                                           | 1.37 (1.11, 1.68)                                                      | 0.0033   |
| Lp-PLA <sub>2</sub> Quartile 3 v. 1                                                                                           | 1.60 (1.31, 1.97)                                                      | <0.0001  |
| Lp-PLA <sub>2</sub> Quartile 4 v. 1                                                                                           | 1.60 (1.31, 1.96)                                                      | <0.0001  |
| <b><i>Lp-PLA<sub>2</sub> quartiles + sex + diabetic medication</i></b>                                                        |                                                                        |          |
| Lp-PLA <sub>2</sub> Quartile 2 v. 1                                                                                           | 1.38 (1.12, 1.70)                                                      | 0.0024   |
| Lp-PLA <sub>2</sub> Quartile 3 v. 1                                                                                           | 1.58 (1.30, 1.93)                                                      | <0.0001  |
| Lp-PLA <sub>2</sub> Quartile 4 v. 1                                                                                           | 1.61 (1.32, 1.97)                                                      | <0.0001  |
| <b><i>Lp-PLA<sub>2</sub> quartiles + sex + diabetic medication + use of statins</i></b>                                       |                                                                        |          |
| Lp-PLA <sub>2</sub> Quartile 2 v. 1                                                                                           | 1.41 (1.14, 1.74)                                                      | 0.0014   |
| Lp-PLA <sub>2</sub> Quartile 3 v. 1                                                                                           | 1.63 (1.33, 1.98)                                                      | <0.0001  |
| Lp-PLA <sub>2</sub> Quartile 4 v. 1                                                                                           | 1.71 (1.40, 2.10)                                                      | <0.0001  |
| <b><i>Lp-PLA<sub>2</sub> quartiles + sex + diabetic medication + use of statins + HbA<sub>1c</sub></i></b>                    |                                                                        |          |
| Lp-PLA <sub>2</sub> Quartile 2 v. 1                                                                                           | 1.35 (1.08, 1.67)                                                      | 0.0072   |
| Lp-PLA <sub>2</sub> Quartile 3 v. 1                                                                                           | 1.56 (1.27, 1.91)                                                      | <0.0001  |
| Lp-PLA <sub>2</sub> Quartile 4 v. 1                                                                                           | 1.70 (1.38, 2.09)                                                      | <0.0001  |
| <b><i>Lp-PLA<sub>2</sub> quartiles + sex + diabetic medication + use of statins + HbA<sub>1c</sub> + SBP</i></b>              |                                                                        |          |
| Lp-PLA <sub>2</sub> Quartile 2 v. 1                                                                                           | 1.35 (1.08, 1.67)                                                      | 0.0075   |
| Lp-PLA <sub>2</sub> Quartile 3 v. 1                                                                                           | 1.53 (1.24, 1.88)                                                      | <0.0001  |
| Lp-PLA <sub>2</sub> Quartile 4 v. 1                                                                                           | 1.69 (1.37, 2.08)                                                      | <0.0001  |
| <b><i>Lp-PLA<sub>2</sub> quartiles + sex + diabetic medication + use of statins + HbA<sub>1c</sub> + SBP + LDLc</i></b>       |                                                                        |          |
| Lp-PLA <sub>2</sub> Quartile 2 v. 1                                                                                           | 1.52 (1.21, 1.91)                                                      | 0.0004   |
| Lp-PLA <sub>2</sub> Quartile 3 v. 1                                                                                           | 1.71 (1.37, 2.15)                                                      | <0.0001  |
| Lp-PLA <sub>2</sub> Quartile 4 v. 1                                                                                           | 2.08 (1.64, 2.64)                                                      | <0.0001  |
| <b><i>Lp-PLA<sub>2</sub> quartiles + sex + diabetic medication + use of statins + HbA<sub>1c</sub> + SBP + LDLc + age</i></b> |                                                                        |          |
| Lp-PLA <sub>2</sub> Quartile 2 v. 1                                                                                           | 1.52 (1.21, 1.91)                                                      | 0.0003   |
| Lp-PLA <sub>2</sub> Quartile 3 v. 1                                                                                           | 1.72 (1.37, 2.16)                                                      | <0.0001  |
| Lp-PLA <sub>2</sub> Quartile 4 v. 1                                                                                           | 2.08 (1.64, 2.63)t                                                     | <0.0001  |
| <b>Progression to observable or more severe DR from lower grades (DR0 or DR1 to DR2 or higher) n = 1241</b>                   |                                                                        |          |
| <b><i>Lp-PLA<sub>2</sub> quartiles</i></b>                                                                                    |                                                                        |          |
| Lp-PLA <sub>2</sub> Quartile 2 v. 1                                                                                           | 1.86 (1.29, 2.77)                                                      | 0.0023   |
| Lp-PLA <sub>2</sub> Quartile 3 v. 1                                                                                           | 2.33 (1.59, 3.42)                                                      | <0.001   |
| Lp-PLA <sub>2</sub> Quartile 4 v. 1                                                                                           | 2.21 (1.46, 3.33)                                                      | 0.0002   |
| <b><i>Lp-PLA<sub>2</sub> quartiles + HbA<sub>1c</sub></i></b>                                                                 |                                                                        |          |
| Lp-PLA <sub>2</sub> Quartile 2 v. 1                                                                                           | 1.69 (1.12, 2.55)                                                      | 0.012    |
| Lp-PLA <sub>2</sub> Quartile 3 v. 1                                                                                           | 2.11 (1.41, 3.17)                                                      | 0.0003   |
| Lp-PLA <sub>2</sub> Quartile 4 v. 1                                                                                           | 1.96 (1.27, 3.01)                                                      | 0.002    |
| <b><i>Lp-PLA<sub>2</sub> quartiles + HbA<sub>1c</sub> + SBP</i></b>                                                           |                                                                        |          |

|                                                                                                                                                |                   |         |
|------------------------------------------------------------------------------------------------------------------------------------------------|-------------------|---------|
| Lp-PLA <sub>2</sub> Quartile 2 v. 1                                                                                                            | 1.70 (1.13, 2.56) | 0.012   |
| Lp-PLA <sub>2</sub> Quartile 3 v. 1                                                                                                            | 2.11 (1.41, 3.17) | 0.0003  |
| Lp-PLA <sub>2</sub> Quartile 4 v. 1                                                                                                            | 1.97 (1.28, 3.02) | 0.002   |
| <b><i>Lp-PLA<sub>2</sub> quartiles + HbA<sub>1c</sub> + SBP + LDLc</i></b>                                                                     |                   |         |
| Lp-PLA <sub>2</sub> Quartile 2 v. 1                                                                                                            | 1.91 (1.23, 2.99) | 0.004   |
| Lp-PLA <sub>2</sub> Quartile 3 v. 1                                                                                                            | 2.52 (1.64, 3.88) | <0.0001 |
| Lp-PLA <sub>2</sub> Quartile 4 v. 1                                                                                                            | 2.43 (1.48, 3.97) | 0.0004  |
| <b><i>Lp-PLA<sub>2</sub> quartiles + HbA<sub>1c</sub> + SBP + LDLc + age</i></b>                                                               |                   |         |
| Lp-PLA <sub>2</sub> Quartile 2 v. 1                                                                                                            | 1.91 (1.22, 2.99) | 0.0045  |
| Lp-PLA <sub>2</sub> Quartile 3 v. 1                                                                                                            | 2.62 (1.70, 4.04) | <0.0001 |
| Lp-PLA <sub>2</sub> Quartile 4 v. 1                                                                                                            | 2.79 (1.70, 4.59) | <0.0001 |
| <b>Progression to referable or proliferative DR from lower grades (DR0, DR1 or DR2 to DR3 or higher) n = 1364</b>                              |                   |         |
| <b><i>Lp-PLA<sub>2</sub> quartiles</i></b>                                                                                                     |                   |         |
| Lp-PLA <sub>2</sub> Quartile 2 v. 1                                                                                                            | 1.76 (1.23, 2.50) | 0.0018  |
| Lp-PLA <sub>2</sub> Quartile 3 v. 1                                                                                                            | 1.81 (1.26, 2.60) | 0.0013  |
| Lp-PLA <sub>2</sub> Quartile 4 v. 1                                                                                                            | 1.83 (1.25, 2.66) | 0.0017  |
| <b><i>Lp-PLA<sub>2</sub> quartiles + DR grade at baseline</i></b>                                                                              |                   |         |
| Lp-PLA <sub>2</sub> Quartile 2 v. 1                                                                                                            | 1.83 (1.28, 2.60) | 0.0008  |
| Lp-PLA <sub>2</sub> Quartile 3 v. 1                                                                                                            | 1.89 (1.31, 2.73) | 0.0006  |
| Lp-PLA <sub>2</sub> Quartile 4 v. 1                                                                                                            | 1.97 (1.35, 2.86) | 0.0004  |
| <b><i>Lp-PLA<sub>2</sub> quartiles + DR grade at baseline + use of diabetic medication</i></b>                                                 |                   |         |
| Lp-PLA <sub>2</sub> Quartile 2 v. 1                                                                                                            | 1.82 (1.28, 2.60) | 0.0009  |
| Lp-PLA <sub>2</sub> Quartile 3 v. 1                                                                                                            | 1.96 (1.36, 2.83) | 0.0003  |
| Lp-PLA <sub>2</sub> Quartile 4 v. 1                                                                                                            | 2.06 (1.42, 3.00) | 0.0001  |
| <b><i>Lp-PLA<sub>2</sub> quartiles + DR grade at baseline + use of diabetic medication + HbA<sub>1c</sub></i></b>                              |                   |         |
| Lp-PLA <sub>2</sub> Quartile 2 v. 1                                                                                                            | 1.70 (1.19, 2.45) | 0.004   |
| Lp-PLA <sub>2</sub> Quartile 3 v. 1                                                                                                            | 1.88 (1.28, 2.76) | 0.0014  |
| Lp-PLA <sub>2</sub> Quartile 4 v. 1                                                                                                            | 1.85 (1.26, 2.72) | 0.0018  |
| <b><i>Lp-PLA<sub>2</sub> quartiles + DR grade at baseline + use of diabetic medication + HbA<sub>1c</sub> + SBP</i></b>                        |                   |         |
| Lp-PLA <sub>2</sub> Quartile 2 v. 1                                                                                                            | 1.70 (1.18, 2.44) | 0.004   |
| Lp-PLA <sub>2</sub> Quartile 3 v. 1                                                                                                            | 1.87 (1.27, 2.74) | 0.0015  |
| Lp-PLA <sub>2</sub> Quartile 4 v. 1                                                                                                            | 1.85 (1.25, 2.72) | 0.002   |
| <b><i>Lp-PLA<sub>2</sub> quartiles + DR grade at baseline + use of diabetic medication + HbA<sub>1c</sub> + SBP + smoking status</i></b>       |                   |         |
| Lp-PLA <sub>2</sub> Quartile 2 v. 1                                                                                                            | 1.74 (1.21, 2.50) | 0.0027  |
| Lp-PLA <sub>2</sub> Quartile 3 v. 1                                                                                                            | 2.02 (1.36, 2.98) | 0.0004  |
| Lp-PLA <sub>2</sub> Quartile 4 v. 1                                                                                                            | 1.97 (1.33, 2.93) | 0.0008  |
| <b><i>Lp-PLA<sub>2</sub> quartiles + DR grade at baseline + use of diabetic medication + HbA<sub>1c</sub> + SBP + smoking status + age</i></b> |                   |         |
| Lp-PLA <sub>2</sub> Quartile 2 v. 1                                                                                                            | 1.75 (1.22, 2.52) | 0.0024  |
| Lp-PLA <sub>2</sub> Quartile 3 v. 1                                                                                                            | 2.06 (1.40, 3.04) | 0.0003  |
| Lp-PLA <sub>2</sub> Quartile 4 v. 1                                                                                                            | 1.99 (1.34, 2.94) | 0.0006  |

### Sensitivity analysis – 5 year follow-up period

N = 2452, number of incident DR = 1038, number of competing events = 330, number censored = 1084

*ESM Table 3 Hazard ratios for quartiles of Lp-PLA<sub>2</sub> at 5 years in a 5 year follow-up period*

| Lp-PLA <sub>2</sub> quartiles                                                                                              | Hazard Ratios (95% CI) | P value |
|----------------------------------------------------------------------------------------------------------------------------|------------------------|---------|
| <b>Main effects model</b>                                                                                                  |                        |         |
| Q1                                                                                                                         | --                     | --      |
| Q2                                                                                                                         | 1.12 (0.94, 1.35)      | 0.21    |
| Q3                                                                                                                         | 1.18 (0.99, 1.40)      | 0.06    |
| Q4                                                                                                                         | 1.15 (0.97, 1.37)      | 0.11    |
| <b>Adjusted model</b> (adjusted for use of diabetic medication, lipid modifying medication, HbA1c, SBP, LDL, sex, and age) |                        |         |
| Q1                                                                                                                         | --                     | --      |
| Q2                                                                                                                         | 1.17 (0.95, 1.43)      | 0.13    |
| Q3                                                                                                                         | 1.14 (0.93, 1.40)      | 0.20    |
| Q4                                                                                                                         | 1.26 (1.02, 1.56)      | 0.03    |

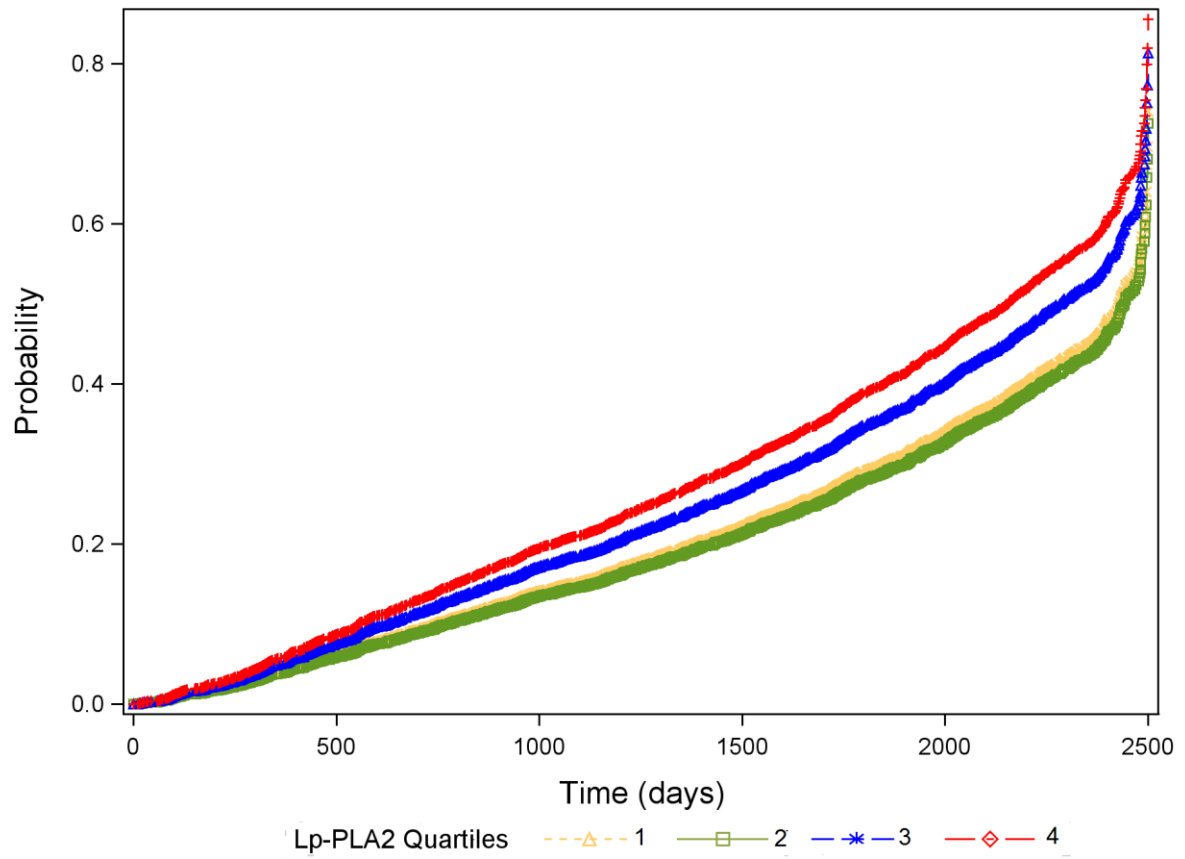

ESM Fig 1 Survival Analysis – probability of death by Lp-PLA<sub>2</sub> quartiles in the GoDARTS cohort (n = 6371). The model was adjusted for gender and age

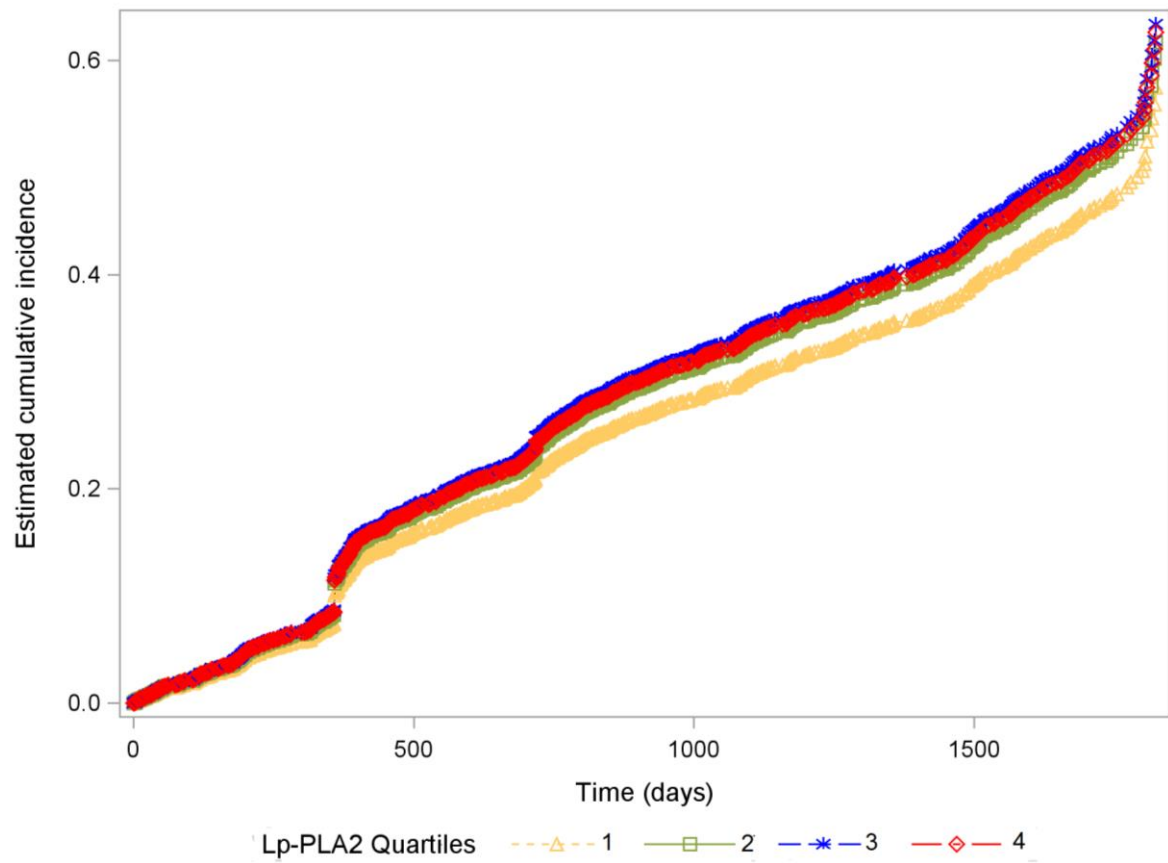

ESM Fig 2 Cumulative incidence plot for the main effect of Lp-PLA<sub>2</sub> quartiles on the development of incident DR adjusted for the competing risk of death in a 5 year follow-up period.
